# Supplementary material for: Effects of Nitrogen Fertilization and Plant Density on Proso Millet (Panicum miliaceum L.) Growth and Yield under Mediterranean Pedoclimatic Conditions
Source: MDPI journal article supplement (doi:10.3390/agriculture13091657), 2023-08-22
Supplement: s1 [file s1]

Supplementary section:

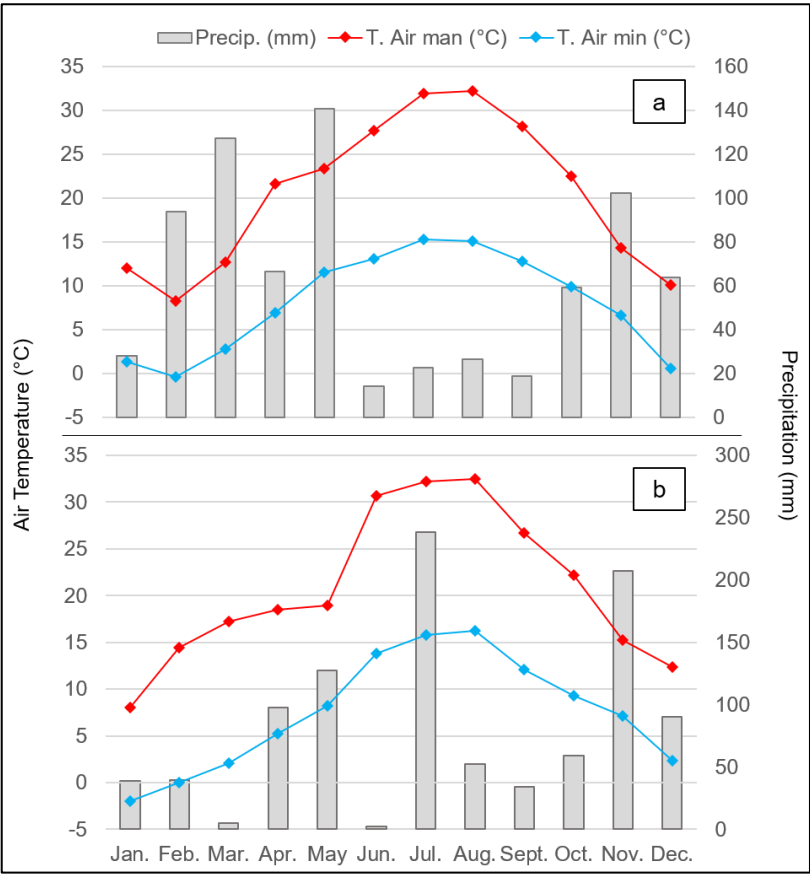

Figure S1. Monthly air temperatures (maximum and minimum) and precipitation for the years 2018 (a) and 2019 (b) recorded in the study area.
